# Supplementary material for: Effect of Sample Storage Conditions on Measurements of Salivary Cotinine Levels
Source: PubMed Central journal article supplement (PMC7569849; doi:10.3390/metabo10090365), 2020-09-08
Supplement: metabolites-10-00365-s001.pdf [file metabolites-10-00365-s001.pdf]

**Table S1.** Bland-Altman analysis using the values from immediate analyses as the reference method

| Storage condition | Mean difference with immediate (95% CI) | Standard error | Width of limits of agreement |
|-------------------|-----------------------------------------|----------------|------------------------------|
| Mail              | 10.2 (-1.6;22.1)                        | 6.0            | 156.8                        |
| 4°C for 30 days   | -11.1 (-22.1;0.0)                       | 5.6            | 148.1                        |
| 4°C for 90 days   | 17.6 (7.5;27.7)                         | 5.1            | 135.4                        |
| -20°C for 30 days | 23.8 (14.1;33.6)                        | 5.0            | 131.0                        |
| -20°C for 90 days | 13.4 (5.6;21.2)                         | 3.9            | 104.0                        |

**Table S2.** Shapiro-Francia W 'test for normality

| Storage condition | W    | V    | Prob>z |
|-------------------|------|------|--------|
| Immediate         | 0.98 | 3.15 | 0.01   |
| Mail              | 0.98 | 3.05 | 0.01   |
| 4°C for 30 days   | 0.98 | 2.92 | 0.01   |
| 4°C for 90 days   | 0.99 | 1.75 | 0.13   |
| -20°C for 30 days | 0.98 | 3.49 | 0.01   |
| -20°C for 90 days | 0.98 | 3.39 | 0.01   |

**Table S3.** Skewness and kurtosis tests for normality

| Storage condition | Pr(Skewness) | Pr(Kurtosis) | Prob>chi2 |
|-------------------|--------------|--------------|-----------|
| Immediate         | 0.01         | 0.309        | 0.02      |
| Mail              | 0.01         | 0.421        | 0.03      |
| 4°C for 30 days   | 0.02         | 0.869        | 0.08      |
| 4°C for 90 days   | 0.18         | 0.321        | 0.25      |
| -20°C for 30 days | 0.01         | 0.213        | 0.01      |
| -20°C for 90 days | 0.01         | 0.438        | 0.04      |

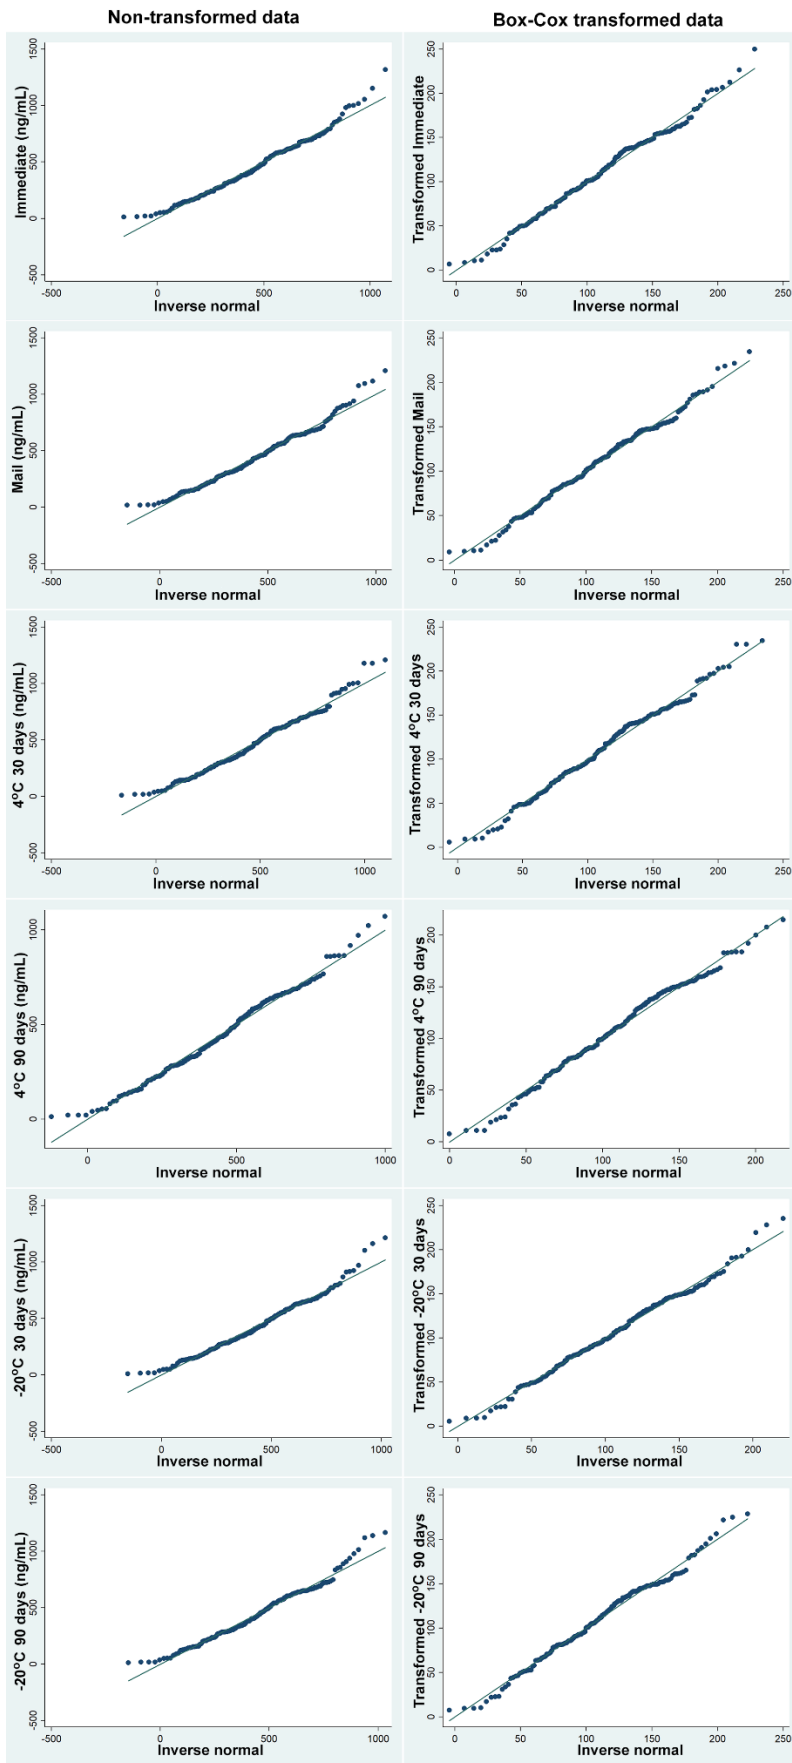

**Figure S1.** Normal quantile plots of the original and Box-Cox transformed data demonstrating a marginal improvement in data distribution. The Box-Cox transformation value used in the analyses was 0.72433.
